# Supplementary material for: High-performance ultraviolet photodetectors based on CdS/CdS:SnS2superlattice nanowires
Source: Royal Society of Chemistry journal article supplement (doi:10.1039/c6nr02915a), 2016-01-01
Supplement: c6nr02915a1.pdf [file c6nr02915a1.pdf]

## Supporting Information

High-performance ultraviolet photodetectors based on CdS/CdS:SnS<sub>2</sub> superlattice nanowires

Authors: Guangyang Gou<sup>a,b</sup>, Guozhang Dai<sup>\*a,b</sup>, Chuan Qian<sup>a,b</sup>, Yufeng Liu<sup>c</sup>, Yan Fu<sup>b</sup>, Zhenyang Tian<sup>b</sup>, Yinke He<sup>a,b</sup>, Lingan Kong<sup>a,b</sup>, Junliang Yang<sup>a,b</sup>, Jia Sun<sup>\*a,b</sup>, and Yongli Gao<sup>a,b,d</sup>

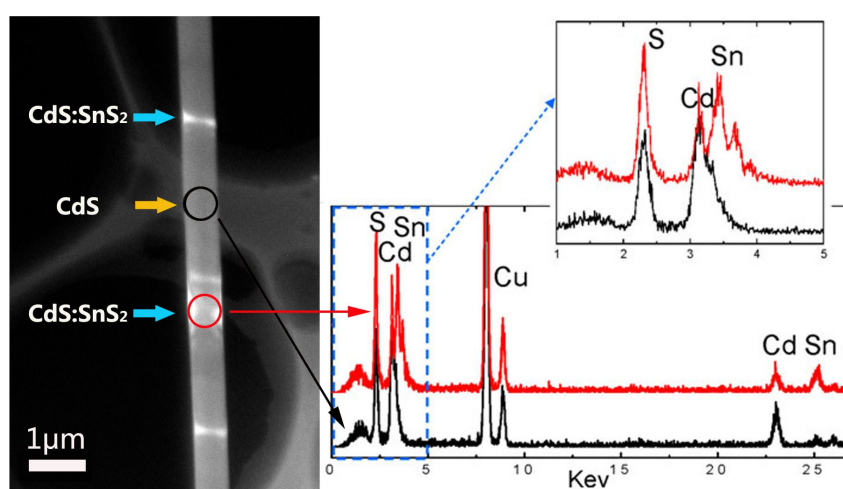

**Figure S1.** The position depend TEM image and related EDS profiles.

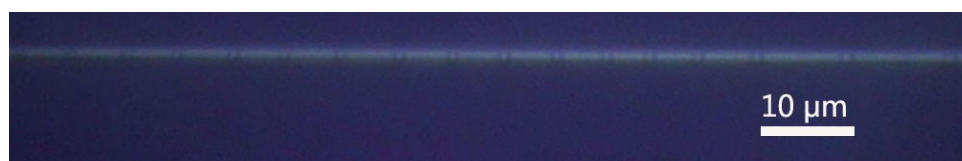

**Figure S2.** A typical bright-field optical image of the CdS/CdS:SnS<sub>2</sub> superlattice wire.
